# Supplementary material for: Sensitive colorimetric detection of glucose and cholesterol by using Au@Ag core–shell nanoparticles
Source: Royal Society of Chemistry journal article supplement (doi:10.1039/c6ra04976a), 2016-01-01
Supplement: c6ra04976a1.pdf [file c6ra04976a1.pdf]

## Supporting Information

### **Sensitive colorimetric detection of glucose and cholesterol by using Au@Ag core-shell nanoparticles**

Xuehong Zhang<sup>a</sup>, Min Wei<sup>b</sup>, Bingjing Lv<sup>a</sup>, Yuanjian Liu<sup>a</sup>, Xu Liu<sup>a</sup>, Wei Wei<sup>\*a</sup>,

*<sup>a</sup>Key Laboratory of Environmental Medicine Engineering, Ministry of Education, Jiangsu Province Hi-Tech Key Laboratory for Bio-medical Research, School of Chemistry and Chemical Engineering, Southeast University, Nanjing, 211189, P.R. China*

*<sup>b</sup>College of Food Science and Technology, Henan University of Technology, Zhengzhou, 450001, P.R. China*

*\*Corresponding author at: School of Chemistry and Chemical Engineering, Southeast University, Nanjing, 211189, PR China. Tel.: 86-25-52090613; Fax: 86-25-52090618.*

*E-mail addresses: [weiw@seu.edu.cn](mailto:weiw@seu.edu.cn) (W. Wei)*

Fig. S1

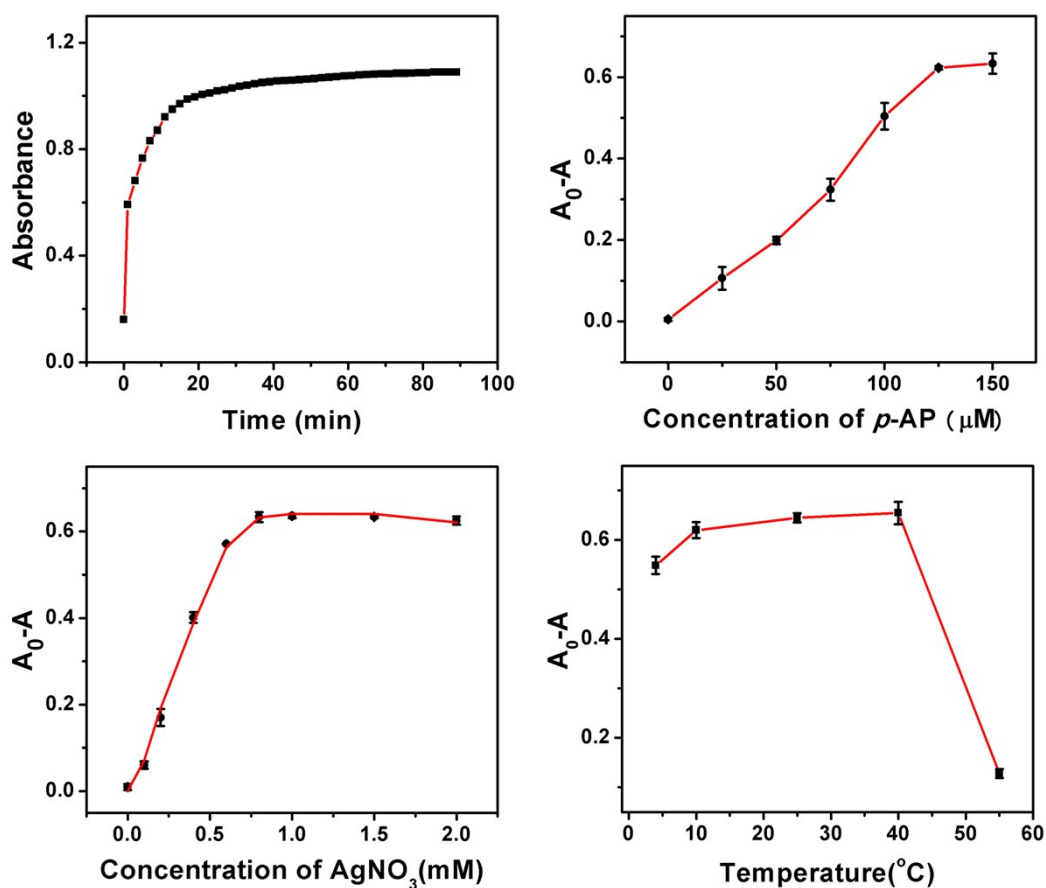

**Fig. S1** Time dependence of the absorbance at 375 nm after the addition of  $\text{AgNO}_3$  (1 mM) and  $p$ -AP (125  $\mu\text{M}$ ) to 4 nM AuNPs dispersion in DEA buffer (A). Impact of concentration of  $p$ -AP (B)  $\text{AgNO}_3$  (C) and deposition temperature (D) on the absorbance decrease ( $A_0 - A$ ) ( $A_0$  and  $A$  are absorbance at 375 nm in the absence and the presence of 250  $\mu\text{M}$   $\text{H}_2\text{O}_2$ , respectively) of Au@Ag NPs. Error bars represent the standard deviations of three repetitive experiments.

Fig. S2

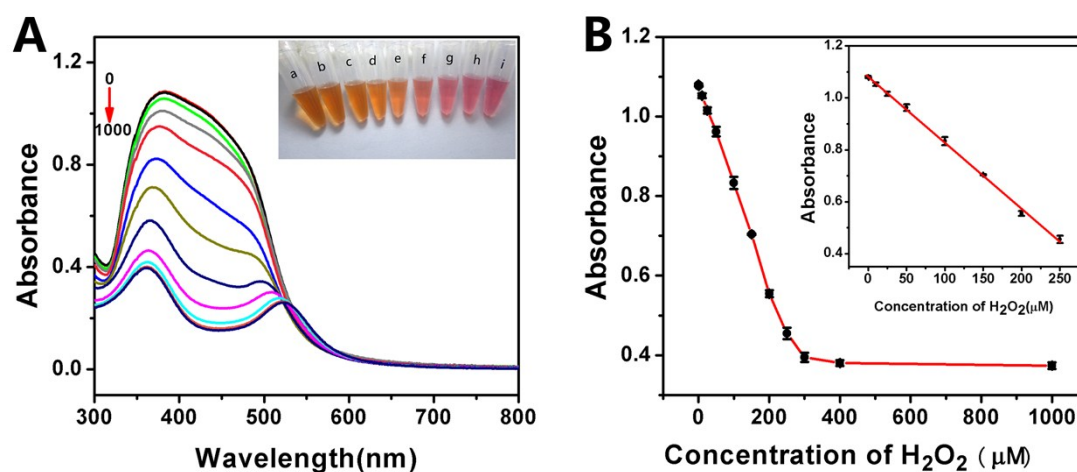

**Fig. S2** (A) UV–vis absorption spectra of detection system after addition of various concentration of H<sub>2</sub>O<sub>2</sub> (from top to bottom: 0, 0.5, 10, 25, 50, 100, 150, 200, 250, 300, 400, 1000 μM). The inset shows photographs of the colorimetric assay towards different concentrations of H<sub>2</sub>O<sub>2</sub> (from a to i: 0, 0.5, 10, 25, 50, 100, 150, 200, 250 μM). (B) Plot of the absorbance (at 375nm) against the H<sub>2</sub>O<sub>2</sub> concentration. The inset is linear response of the detection system to H<sub>2</sub>O<sub>2</sub>. Error bars represent the standard deviations of three repetitive experiments.

**Table S1** Comparison of analytical performance of various sensing systems for the detection of glucose and cholesterol.

| Analytes    | Probe                              | Signal type       | LOD( $\mu\text{M}$ ) | Linear range ( $\mu\text{M}$ ) | Reference |
|-------------|------------------------------------|-------------------|----------------------|--------------------------------|-----------|
| glucose     | Co <sub>2</sub> Nx/NG              | Electrochemistry  | 6.93                 | 10~4750                        | 1         |
|             | Carbon Nanodots                    | Electrochemistry  | 1.07±0.03            | 0~640                          | 2         |
|             | CuNPs                              | Fluorescence      | 50                   | 50~1600                        | 3         |
|             | MnO <sub>2</sub> -Modified UCNPs   | FRET              | 3.7                  | 0~400                          | 4         |
|             | BA-functionalized BMFON            | SERS              | 100                  | 100~10000                      | 5         |
|             | Hemin@HKUST-1                      | Chemiluminescence | 7.5                  | 7.5~750                        | 6         |
|             | Gold Nanodot                       | Luminescence      | 1.0                  | 30~1000                        | 7         |
|             | SiQDs                              | Photoluminescence | 0.68                 | 5~650                          | 8         |
|             | Positively-charged AuNPs           | Colorimetry       | 4                    | 18~1100                        | 9         |
|             | Silver Nanoprism                   | Colorimetry       | 0.2                  | 0.2~100                        | 10        |
| Au@AgNPs    | Colorimetry                        | 0.24              | 0.5~400              | This work                      |           |
| cholesterol | Grp/ $\beta$ -CD/Methylene Blue    | Electrochemistry  | less than 1          | 1~100                          | 11        |
|             | GA-MNP/PDDA/MWCNT                  | Electrochemistry  | 0.85                 | 10~950                         | 12        |
|             | Gold Nanocluster                   | Fluorescence      | 1.4                  | 1~100                          | 13        |
|             | AuNPs                              | ECL               | 1.1                  | 3.3~1000                       | 14        |
|             | CdTe-MWCNTs@rGONRs                 | ECL               | 0.33                 | 1~1000                         | 15        |
|             | CuO NPs                            | Chemiluminescence | 0.17                 | 0.625~12.5                     | 16        |
|             | MoS <sub>2</sub> NRs–Au NPs system | Colorimetry       | 15                   | 40~1000                        | 17        |
|             | DNAzymes                           | Colorimetry       | 0.10                 | 1.0~30                         | 18        |
|             | Au@AgNPs                           | Colorimetry       | 0.15                 | 0.3~300                        | This work |

## References

- 1 L. J. Kong, Z. Y. Ren, S. C. Du, J. Wu and H. G. Fu, *Chem. Commun.*, 2014, **50**, 4921–4923.
- 2 M. Zhao, Y. Gao, J. Y. Sun and F. Gao, *Anal. Chem.*, 2015, **87**, 2615–2622.
- 3 Z. G. Mao, Z. H. Qing, T. P. Qing, F. Z. Xu, L. Wen, X. X. He, D. G. He, H. Shi and K. M. Wang, *Anal. Chem.*, 2015, **87**, 7454–7460.
- 4 J. Yuan, Y. Cen, X. J. Kong, S. Wu, C. L. Liu, R. Q. Yu and X. Chu, *ACS Appl. Mater. Interfaces*, 2015, **7**, 10548–10555.
- 5 K. V. Kong, Z. Lam, W. Kam, O. Lau, W. K. Leong and M. Olivo, *J. Am. Chem. Soc.*, 2013, **135**, 18028–18031.
- 6 F. Q. Luo, Y. L. Lin, L. Y. Zheng, X. M. Lin and Y. W. Chi, *ACS Appl. Mater. Interfaces*, 2015, **7**, 11322–11329.
- 7 Y. C. Shiang, C. C. Huang and H. T. Chang, *Chem. Commun.*, 2009, **23**, 3437–3439.
- 8 Y. H. Yi, J. H. Deng, Y. Y. Zhang, H. T. Li and S. Z. Yao, *Chem. Commun.*, 2013, **49**, 612–614.
- 9 Y. Jv, B. X. Li and R. Cao, *Chem. Commun.*, 2010, **46**, 8017–8019.
- 10 Y. S. Xia, J. J. Ye, K. H. Tan, J. J. Wang and G. Yang, *Anal. Chem.*, 2013, **85**, 6241–6247.
- 11 N. Agnihotri, A. D. Chowdhury and A. De, *Biosens. Bioelectron.*, 2015, **63**, 212–217.
- 12 M. Eguílaz, R. Villalonga and Y. Paloma, P. Yanez-Sedeno and J. M. Pingarron, *Anal. Chem.* 2011, **83**, 7807–7814.
- 13 H. C. Chang and J. A. A. Ho, *Anal. Chem.*, 2015, **87**, 10362–10367.
- 14 M. H. Zhang, R. Yuan, Y. Q. Chai, S. H. Chen, H. A. Zhong, C. Wang and Y. F. Cheng, *Biosens. Bioelectron.*, 2012, **32**, 288–292.
- 15 J. Huan, Q. Liu, A. R. Fei, J. Qian, X. Y. Dong, B. J. Qiu, H. P. Mao and K. Wang, *Biosens. Bioelectron.*, 2015, **73**, 221–227.
- 16 L. Hong, A. L. Liu, G. W. Li, W. Chen and X. H. Lin, *Biosens. Bioelectron.*, 2013, **43**, 1–5.
- 17 N. R. Nirala, S. Pandey, A. Bansal, V. K. Singh, B. Mukherjee, P. S. Saxena and A. Srivastava, *Biosens. Bioelectron.*, 2015, **74**, 207–213.
- 18 R. Li, C. Xiong, Z. Y. Xiao and L. S. Ling, *Anal. Chim. Acta*, 2012, **724**, 80–85.
